# Supplementary material
Source: PubMed Central journal article supplement (PMC8049980)

Uncut image for Fig 1B

**MCU**

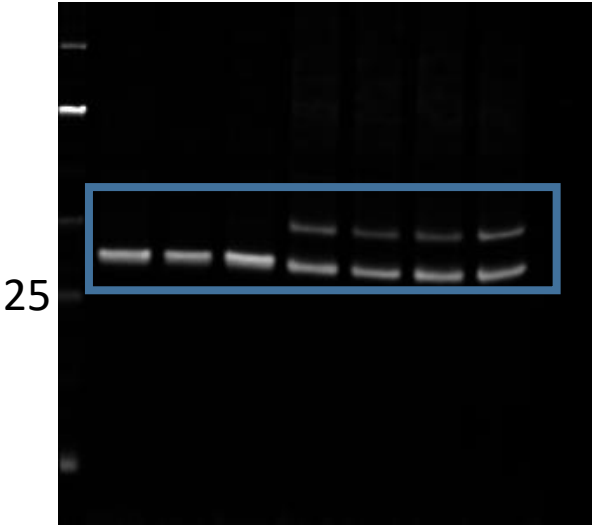

**flag**

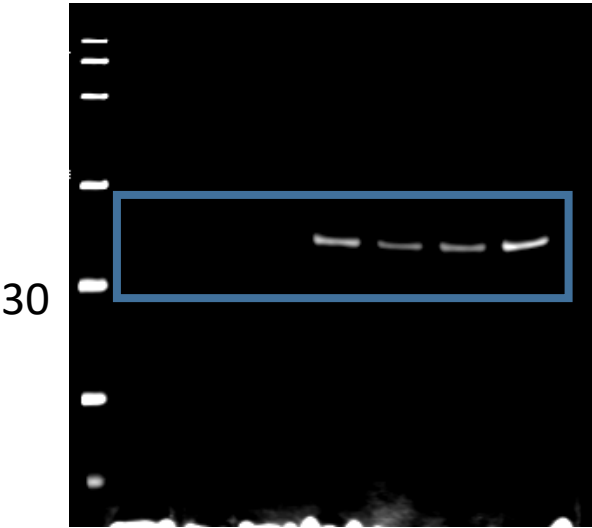

**EMRE**

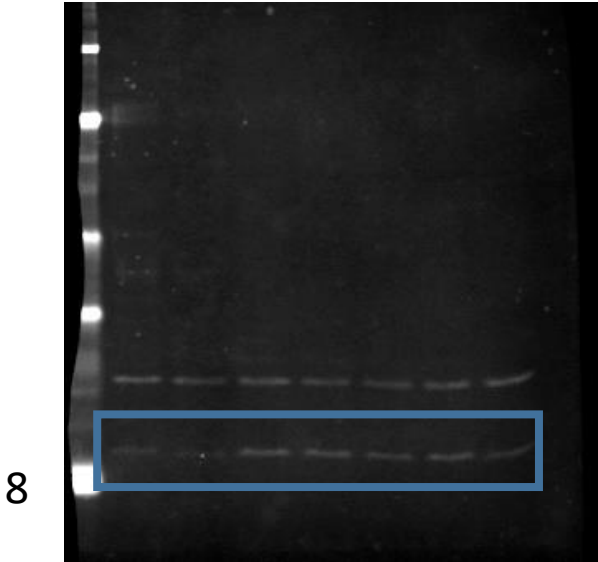

**VDAC**

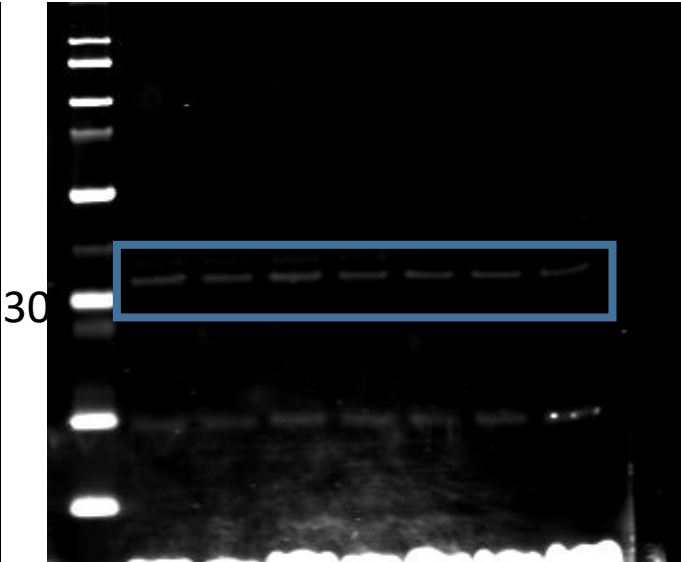

Uncut image for Fig 4D

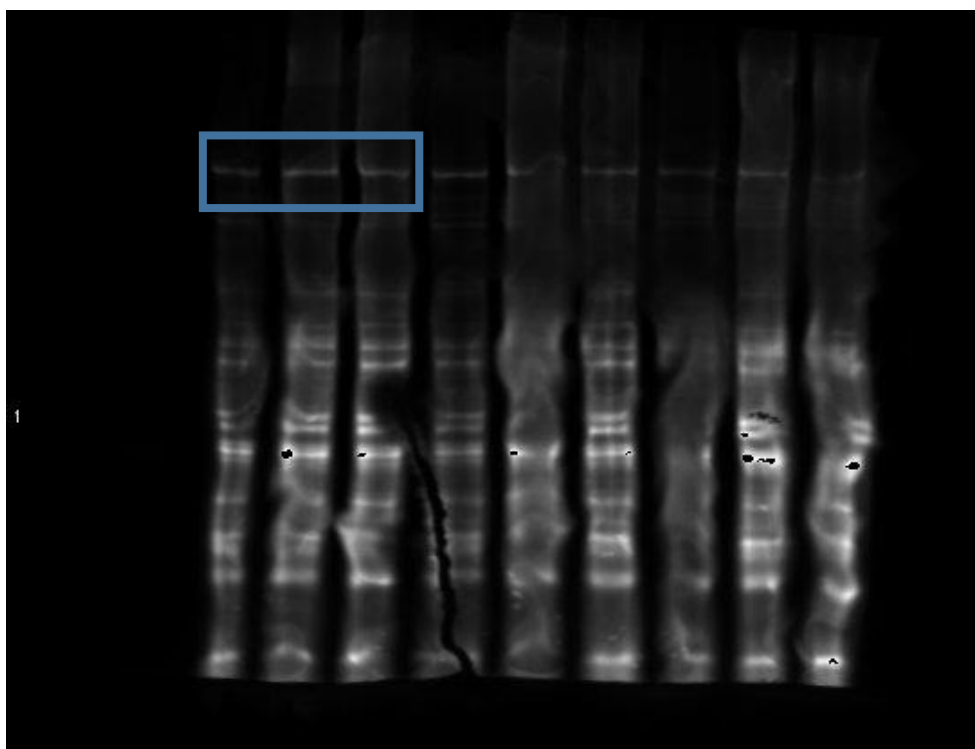

Supplement: NIHMS1673363-supplement-318561_Uncut_Gel_Blots.pdf [file NIHMS1673363-supplement-318561_Uncut_Gel_Blots.pdf]
